# Supplementary material
Source: MDPI journal article supplement (https://www.mdpi.com/2073-445X/13/4/562)

## Supplementary Information

### Figure captions

**Figure S1a.** Spatial pattern of population (POP) in the YRDUA from 1990 to 2020.

**Figure S1b.** Spatial pattern of gross domestic product (GDP) in the YRDUA from 1990 to 2020.

**Figure S1c.** Spatial pattern of urban land percentage (ULP) in the YRDUA from 1990 to 2020.

**Figure S1a**

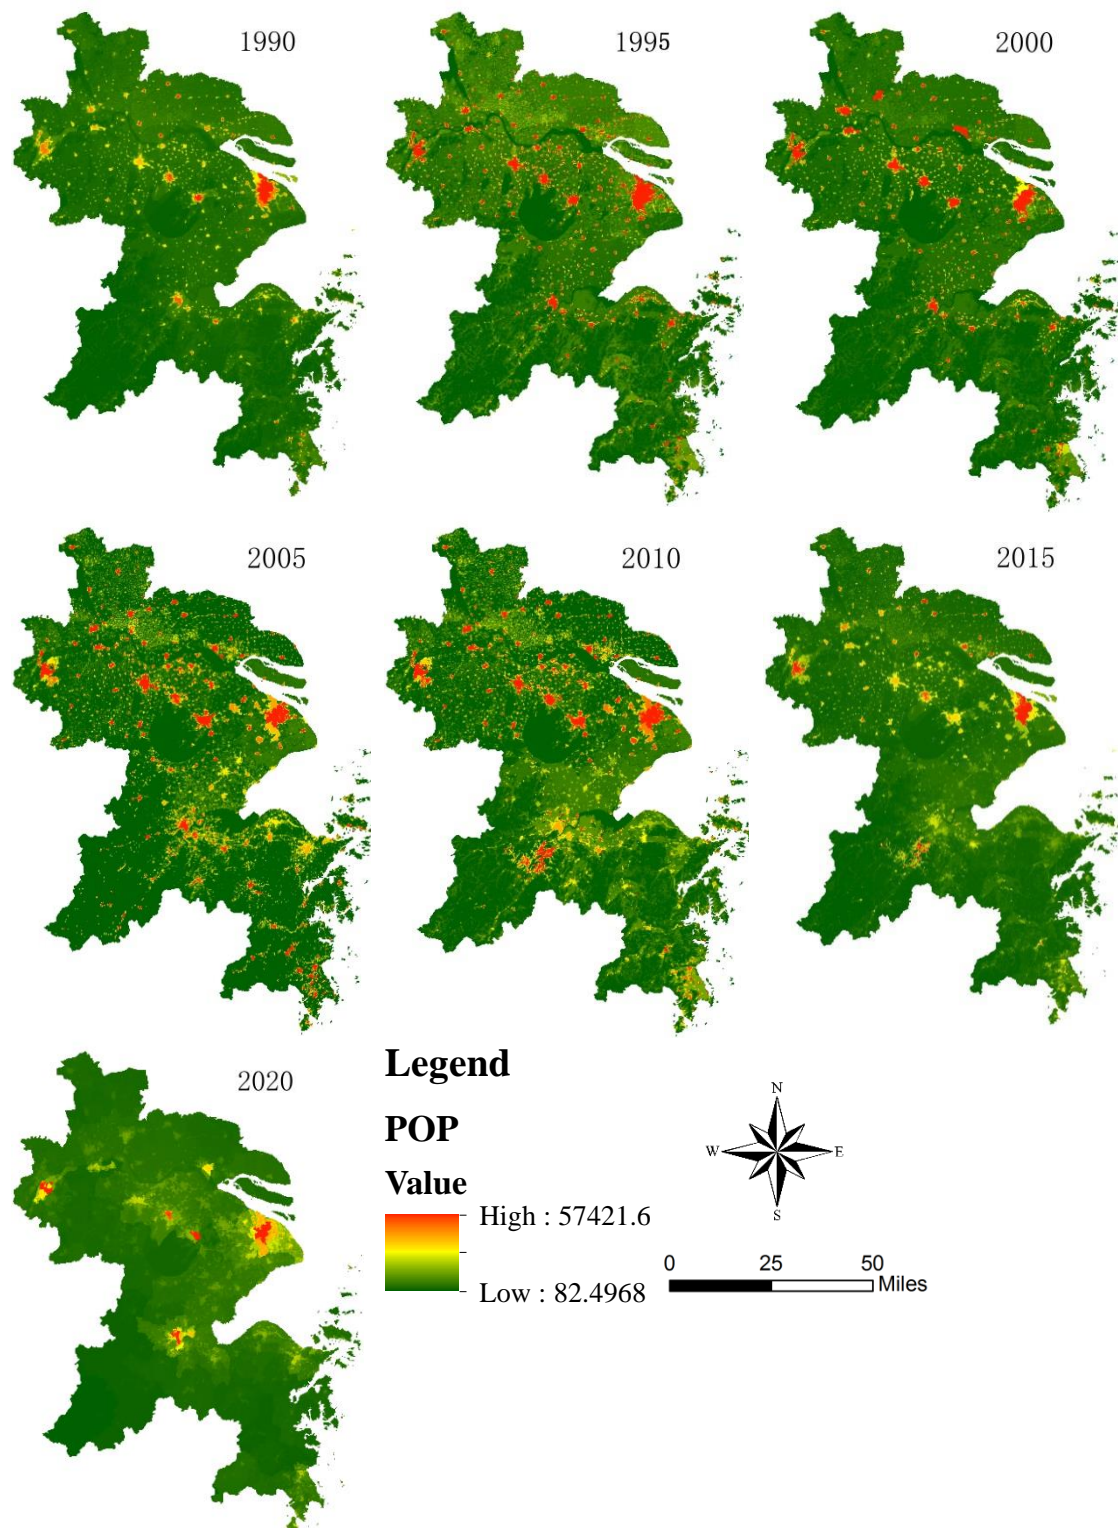

**Figure S1b**

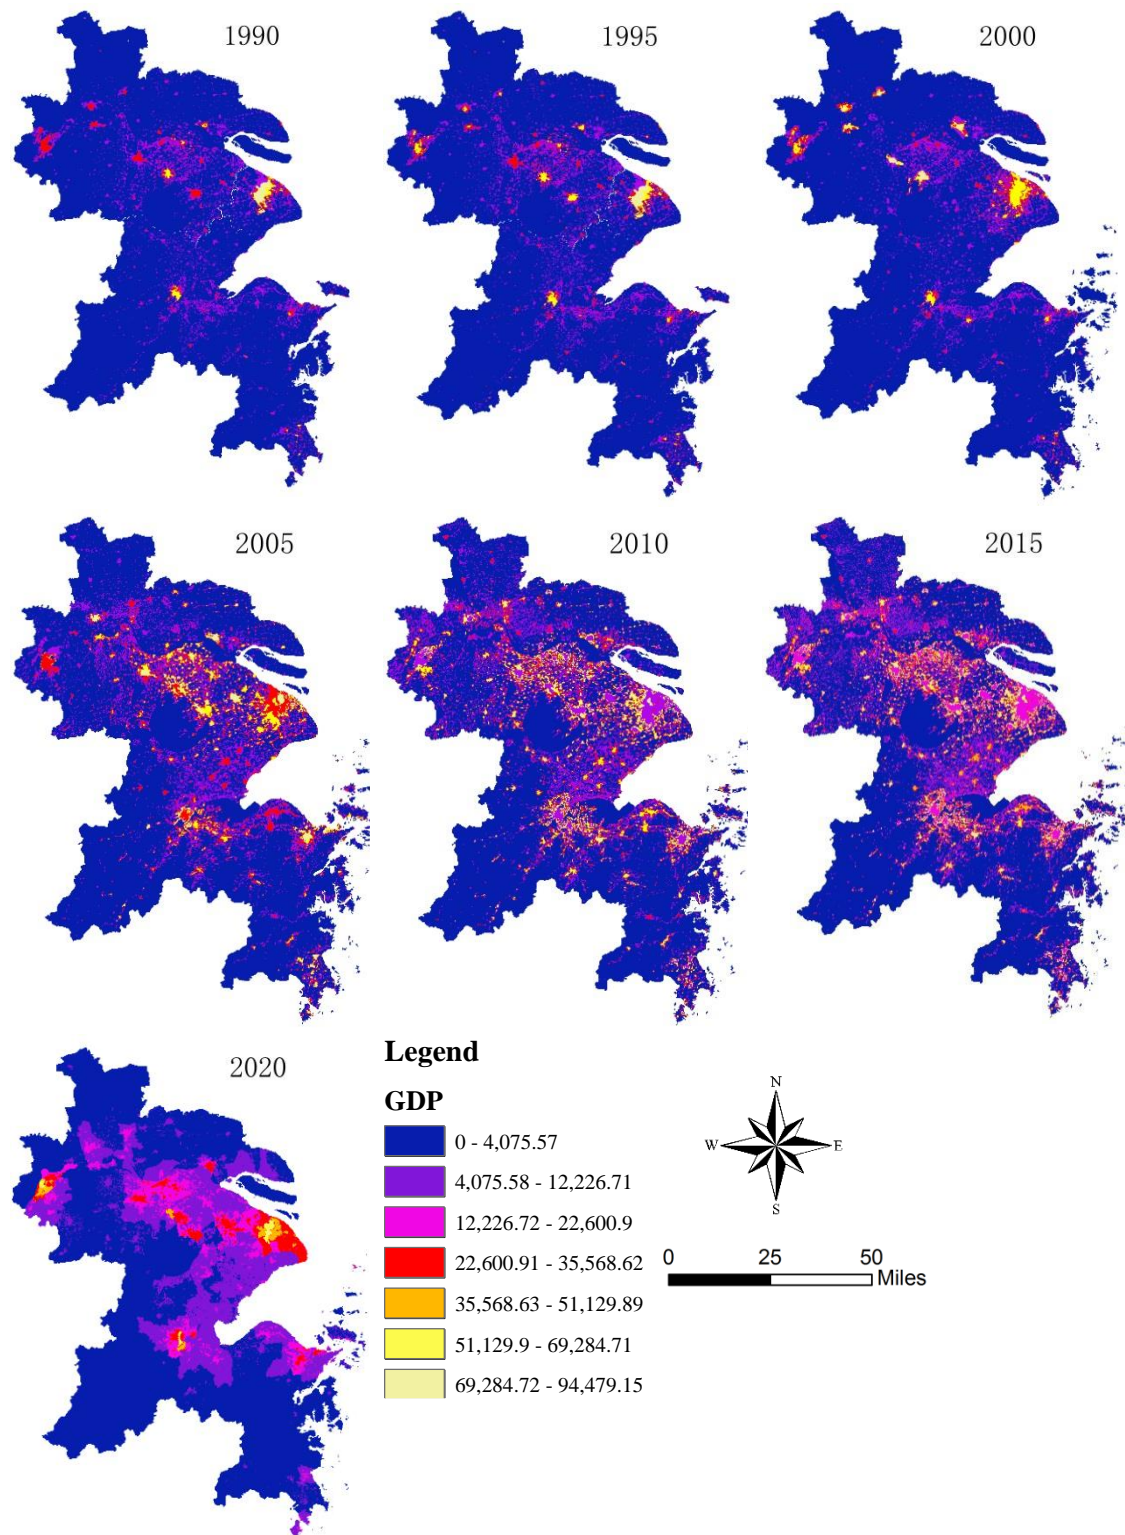



**Figure S1c**

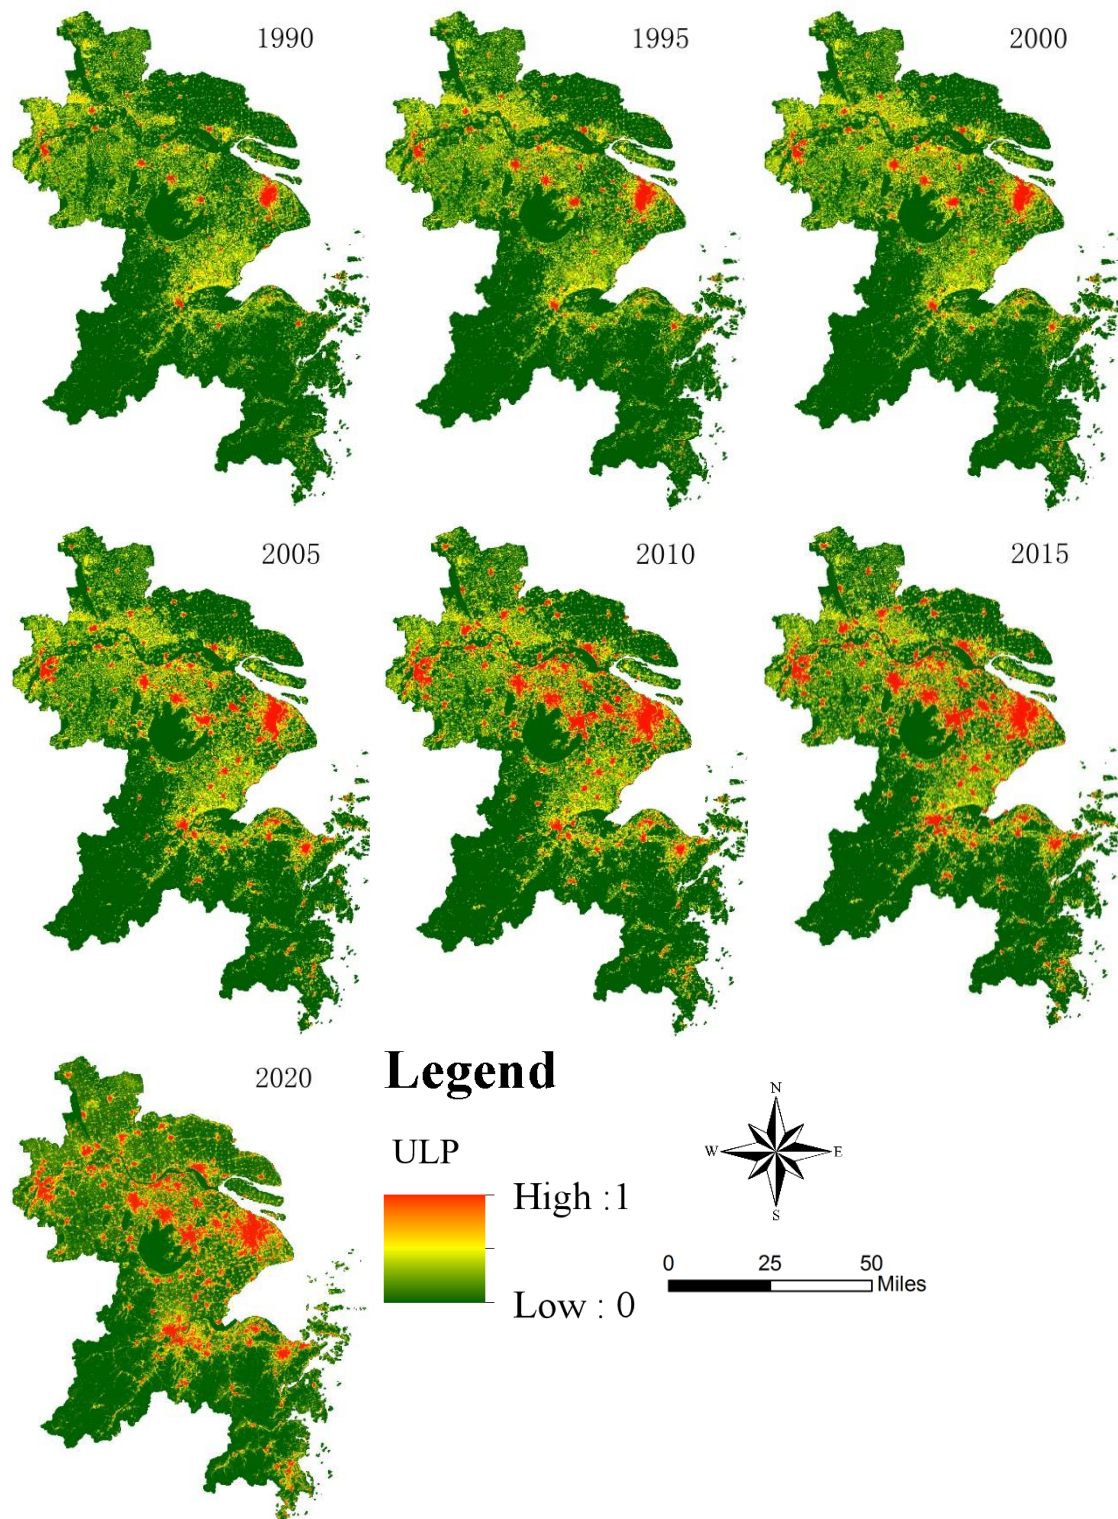

Supplement: s1 [file s1]
